# Supplementary material for: Definitions of blinding in randomised controlled trials of interventions published in high-impact anaesthesiology journals: a methodological study and survey of authors
Source: PubMed Central journal article supplement — BMJ Open. 2020 Apr 12;10(4):e035168. doi: 10.1136/bmjopen-2019-035168 (PMC7200040; doi:10.1136/bmjopen-2019-035168), 2020-04-12
Supplement: bmjopen-2019-035168supp003.pdf [file bmjopen-2019-035168supp003.pdf]

## Supplementary file 3. Detailed survey responses

| Participant code | Who was blinded in your trial described as a double-blind?                                                                | What is your personal definition of a <u>single-blind</u> trial? | What is your personal definition of a <u>double-blinded</u> trial?                                                            | What is your personal definition of a <u>triple-blind</u> trial?                                                                                               | How often is your personal definition of a double-blind trial used in published trials? |
|------------------|---------------------------------------------------------------------------------------------------------------------------|------------------------------------------------------------------|-------------------------------------------------------------------------------------------------------------------------------|----------------------------------------------------------------------------------------------------------------------------------------------------------------|-----------------------------------------------------------------------------------------|
| 1                | participants healthcare providers such as physicians or nurses taking care of a participant data collectors data analysts | participants                                                     | participants healthcare providers such as physicians or nurses taking care of a participant data collectors                   | participants healthcare providers such as physicians or nurses taking care of a participant data collectors outcome assessors data analysts                    | No answer                                                                               |
| 2                | participants healthcare providers such as physicians or nurses taking care of a participant data collectors               | participants                                                     | participants healthcare providers such as physicians or nurses taking care of a participant data collectors                   | participants healthcare providers such as physicians or nurses taking care of a participant data collectors                                                    | 50%                                                                                     |
| 3                | data analysts manuscript writers                                                                                          | participants                                                     | participants healthcare providers such as physicians or nurses taking care of a participant data collectors outcome assessors | participants healthcare providers such as physicians or nurses taking care of a participant data collectors outcome assessors data analysts manuscript writers | I am unable to respond ; in RCTs of rTMS this is less than 50 %                         |

|   |                                                                                                                                                                                                                         |                                                                                                                                    |                                                                                                                                                                                  |                                                                                                                                                                                                            |                                                                                                                                                                                                                                                                                                                                                    |
|---|-------------------------------------------------------------------------------------------------------------------------------------------------------------------------------------------------------------------------|------------------------------------------------------------------------------------------------------------------------------------|----------------------------------------------------------------------------------------------------------------------------------------------------------------------------------|------------------------------------------------------------------------------------------------------------------------------------------------------------------------------------------------------------|----------------------------------------------------------------------------------------------------------------------------------------------------------------------------------------------------------------------------------------------------------------------------------------------------------------------------------------------------|
| 4 | participants<br>healthcare<br>providers such<br>as physicians or<br>nurses taking<br>care of a<br>participant<br>data collectors<br>outcome<br>assessors<br>data analysts                                               | participants                                                                                                                       | participants<br>healthcare<br>providers such<br>as physicians or<br>nurses taking<br>care of a<br>participant<br>data collectors<br>outcome<br>assessors<br>data analysts        | participants<br>healthcare<br>providers such<br>as physicians<br>or nurses<br>taking care of<br>a participant<br>data collectors<br>outcome<br>assessors<br>data analysts                                  | 100%                                                                                                                                                                                                                                                                                                                                               |
| 5 | participants<br>healthcare<br>providers such<br>as physicians or<br>nurses taking<br>care of a<br>participant<br>data collectors                                                                                        | participants                                                                                                                       | participants<br>healthcare<br>providers such<br>as physicians or<br>nurses taking<br>care of a<br>participant<br>data collectors                                                 | participants<br>healthcare<br>providers such<br>as physicians<br>or nurses<br>taking care of<br>a participant<br>data collectors<br>outcome<br>assessors<br>data analysts                                  | I suppose that in the prospective clinical trials, nowadays, it will be used in a high percentage (80%?), if it is possible to perform the masking in the study area in question. But, of the total of studies that exist, I suspect that it will not be more than 20% of the total, taking into account the high number of retrospective studies. |
| 6 | a. participants<br>b. healthcare<br>providers such<br>as physicians or<br>nurses taking<br>care of a<br>participant<br>c. data<br>collectors<br>d. outcome<br>assessors<br>e. data analysts<br>f. manuscript<br>writers | 1.<br>participants<br>OR<br>2.<br>healthcare<br>providers<br>such as<br>physicians or<br>nurses taking<br>care of a<br>participant | 1.<br>participants<br>2. healthcare<br>providers such<br>as physicians or<br>nurses taking<br>care of a<br>participant<br>3. data<br>collectors<br>4. outcome<br>assessors<br>5. | 1.<br>participants<br>2.<br>healthcare<br>providers such<br>as physicians<br>or nurses<br>taking care of<br>a participant<br>3. data<br>collectors<br>4. outcome<br>assessors<br>5. data<br>analysts<br>6. | 25%                                                                                                                                                                                                                                                                                                                                                |

|    |                                                                                                                                                                               |                                                                |                                                                                                                                                                                                                                                           |                                                                                                                                                                               |                                                                                                                                                                                                                                                                                                                                                                                                                              |
|----|-------------------------------------------------------------------------------------------------------------------------------------------------------------------------------|----------------------------------------------------------------|-----------------------------------------------------------------------------------------------------------------------------------------------------------------------------------------------------------------------------------------------------------|-------------------------------------------------------------------------------------------------------------------------------------------------------------------------------|------------------------------------------------------------------------------------------------------------------------------------------------------------------------------------------------------------------------------------------------------------------------------------------------------------------------------------------------------------------------------------------------------------------------------|
| 7  | participants<br>healthcare providers such as physicians or nurses taking care of a participant<br>data collectors<br>outcome assessors<br>data analysts<br>manuscript writers | participants                                                   | > 1. participants<br>> 2. healthcare providers such as physicians or nurses taking care of a participant<br>> 3. data collectors<br>> 4. outcome assessors<br>> 5. data analysts<br>> 6. manuscript writers                                               | Never heard of this term?                                                                                                                                                     | Not sure I would hope at least 80%                                                                                                                                                                                                                                                                                                                                                                                           |
| 8  | a. participants<br>b. data collectors<br>c. outcome assessors<br>d. data analysts                                                                                             | 1. data collectors<br>2. outcome assessors<br>3. data analysts | 1. participants<br>2. data collectors<br>3. outcome assessors<br>4. data analysts                                                                                                                                                                         | 1. participants<br>2. healthcare providers such as physicians or nurses taking care of a participant<br>3. data collectors<br>4. outcome assessors<br>5. data analysts        | 20%                                                                                                                                                                                                                                                                                                                                                                                                                          |
| 9  | participants<br>healthcare providers such as physicians or nurses taking care of a participant<br>data collectors<br>outcome assessors<br>data analysts<br>manuscript writers | No response?                                                   | participants<br>healthcare providers such as physicians or nurses taking care of a participant<br>data collectors<br>outcome assessors<br>data analysts<br>manuscript writers                                                                             | participants<br>healthcare providers such as physicians or nurses taking care of a participant<br>data collectors<br>outcome assessors<br>data analysts<br>manuscript writers | In trials performed by pharmaceutical companies ph 1 trials are often single blinded whereas all other trials are called double-blinded but are often triple blinded.....or more .....as the only unblinded person(s) is a pharmacist or an assessor who may be unblinded by side effect reports. Those unblinded folks would be clearly specified in the protocol and would not be involved in collection of efficacy data. |
| 10 | participants<br>healthcare providers such as physicians or nurses taking care of a participant<br>data collectors<br>outcome assessors<br><br>manuscript writers              | No response?                                                   | I cannot answer the rest of the questions. I don't use "double-blind" or "single-blind" any longer, as I think they are ambiguous. I adhere to Annals of Internal Medicine guidelines that advises authors to avoid those terms, but to specifically note |                                                                                                                                                                               | No answer                                                                                                                                                                                                                                                                                                                                                                                                                    |

|    |                                                                                                                                             |                                                                                   |                                                                                                                                            |                                                                                                                                                                |                                                     |
|----|---------------------------------------------------------------------------------------------------------------------------------------------|-----------------------------------------------------------------------------------|--------------------------------------------------------------------------------------------------------------------------------------------|----------------------------------------------------------------------------------------------------------------------------------------------------------------|-----------------------------------------------------|
|    |                                                                                                                                             |                                                                                   | who was blinded.                                                                                                                           |                                                                                                                                                                |                                                     |
| 11 | participants healthcare providers such as physicians or nurses taking care of a participant data collectors outcome assessors data analysts | 1. healthcare providers such as physicians or nurses taking care of a participant | participants healthcare providers such as physicians or nurses taking care of a participant data collectors outcome assessors data analyst | participants healthcare providers such as physicians or nurses taking care of a participant data collectors outcome assessors data analysts manuscript writers | I don't specify my personal definition in my trials |
| 12 | participants healthcare providers such as physicians or nurses taking care of a participant data collectors outcome assessors               | participants                                                                      | participants healthcare providers such as physicians or nurses taking care of a participant data collectors outcome assessors              | participants healthcare providers such as physicians or nurses taking care of a participant data collectors outcome assessors data analysts                    | 100%                                                |
| 13 | participants healthcare providers such as physicians or nurses taking care of a participant data collectors outcome assessors               | participants                                                                      | participants healthcare providers such as physicians or nurses taking care of a participant data collectors outcome assessors              | participants healthcare providers such as physicians or nurses taking care of a participant data collectors outcome assessors data analysts manuscript writers | 90%                                                 |

|    |                                                                                                                                                                 |                                                                                                                                                  |                                                                                                                                                                       |                                                                                                                                                                        |                |
|----|-----------------------------------------------------------------------------------------------------------------------------------------------------------------|--------------------------------------------------------------------------------------------------------------------------------------------------|-----------------------------------------------------------------------------------------------------------------------------------------------------------------------|------------------------------------------------------------------------------------------------------------------------------------------------------------------------|----------------|
| 14 | data collectors<br>outcome assessors                                                                                                                            | participants data collectors<br>outcome assessors<br>data analysts                                                                               | participants data collectors<br>outcome assessors<br>data analysts                                                                                                    | participants healthcare providers such as physicians or nurses taking care of a participant<br>data collectors<br>outcome assessors<br>data analysts                   | 60%            |
| 15 | participants *<br>healthcare providers such as physicians or nurses taking care of a participant *<br>outcome assessors                                         | participants<br>4. outcome assessors                                                                                                             | 1. participants and/or 2. healthcare providers such as physicians or nurses taking care of a participant 4. outcome assessors                                         | 1. participants<br>2. healthcare providers such as physicians or nurses taking care of a participant<br>5. outcome assessors                                           | 90%            |
| 16 | participants data collectors                                                                                                                                    | participants                                                                                                                                     | a. participants<br>b. data collector                                                                                                                                  | participants data collectors<br>healthcare providers such as physicians or nurses taking care of a participant                                                         | 70%            |
| 17 | participants *<br>healthcare providers such as physicians or nurses taking care of a participant *<br>data collectors *<br>outcome assessors *<br>data analysts | healthcare providers such as physicians or nurses taking care of a participant<br>3. data collectors<br>4. outcome assessors<br>5. data analysts | . participants<br>2. healthcare providers such as physicians or nurses taking care of a participant<br>3. data collectors<br>4. outcome assessors<br>5. data analysts | 1. participants<br>2. healthcare providers such as physicians or nurses taking care of a participant<br>3. data collectors<br>4. outcome assessors<br>5. data analysts | _I do not know |

|    |                                                                                                                                                                                    |                                                                                                                                                                                                                                          |                                                                                                                                                                                                                               |                                                                                                                                                                                                                                     |                                                                                                                                                                                                       |
|----|------------------------------------------------------------------------------------------------------------------------------------------------------------------------------------|------------------------------------------------------------------------------------------------------------------------------------------------------------------------------------------------------------------------------------------|-------------------------------------------------------------------------------------------------------------------------------------------------------------------------------------------------------------------------------|-------------------------------------------------------------------------------------------------------------------------------------------------------------------------------------------------------------------------------------|-------------------------------------------------------------------------------------------------------------------------------------------------------------------------------------------------------|
| 18 | participants<br>healthcare<br>providers such<br>as physicians or<br>nurses taking<br>care of a<br>participant<br>data collectors<br>outcome<br>assessors<br>data analysts          | participants                                                                                                                                                                                                                             | participants<br>healthcare<br>providers such<br>as physicians or<br>nurses taking<br>care of a<br>participant<br>data collectors<br>outcome<br>assessors<br>data analysts                                                     | participants<br>healthcare<br>providers such<br>as physicians<br>or nurses<br>taking care of<br>a participant<br>data collectors<br>outcome<br>assessors<br>data analysts<br>manuscript<br>writers                                  | This is very hard to<br>estimate. It probably<br>depends on the field of<br>interest and will widely<br>vary between e.g.<br>Oncology,<br>Anesthesiology, Pain,<br>Surgery, Internal<br>Medicine etc. |
| 19 | participants<br>healthcare<br>providers such<br>as physicians or<br>nurses taking<br>care of a<br>participant<br>data collectors<br>outcome<br>assessors                           | participants                                                                                                                                                                                                                             | participants<br>healthcare<br>providers such<br>as physicians or<br>nurses taking<br>care of a<br>participant<br>data collectors<br>outcome<br>assessors                                                                      | participants<br>healthcare<br>providers such<br>as physicians<br>or nurses<br>taking care of<br>a participant<br>data collectors<br>outcome<br>assessors<br>data analysts                                                           | 90%                                                                                                                                                                                                   |
| 20 | healthcare<br>providers such<br>as physicians or<br>nurses taking<br>care of a<br>participant<br>data collectors<br>outcome<br>assessors<br>data analysts<br>manuscript<br>writers | .<br>participants<br>b.<br>healthcare<br>providers<br>such as<br>physicians or<br>nurses taking<br>care of a<br>participant<br>c. data<br>collectors<br>d.<br>outcome<br>assessors<br>e. data<br>analysts<br>f.<br>manuscript<br>writers | participants<br>b.<br>healthcare<br>providers such<br>as physicians or<br>nurses taking<br>care of a<br>participant<br>c. data<br>collectors<br>d. outcome<br>assessors<br>e. data<br>analysts<br>f.<br>manuscript<br>writers | a.<br>participants<br>b.<br>healthcare<br>providers such<br>as physicians<br>or nurses<br>taking care of<br>a participant<br>c. data<br>collectors<br>d. outcome<br>assessors<br>e. data<br>analysts<br>f.<br>manuscript<br>writers | 20%                                                                                                                                                                                                   |

|    |                                                                                                                                                                           |                                            |                                                                                                                                                    |                                                                                                                                                                                                      |           |
|----|---------------------------------------------------------------------------------------------------------------------------------------------------------------------------|--------------------------------------------|----------------------------------------------------------------------------------------------------------------------------------------------------|------------------------------------------------------------------------------------------------------------------------------------------------------------------------------------------------------|-----------|
| 21 | participants<br>healthcare<br>providers such<br>as physicians or<br>nurses taking<br>care of a<br>participant<br>data collectors                                          | participants                               | a.<br>participants<br>b.<br>healthcare<br>providers such<br>as physicians or<br>nurses taking<br>care of a<br>participant<br>c. data<br>collectors | a.<br>participants<br>b.<br>healthcare<br>providers such<br>as physicians<br>or nurses<br>taking care of<br>a participant<br>c. data<br>collectors<br>d. outcome<br>assessors<br>e. data<br>analysts | No answer |
| 22 | participants<br>data collectors<br>outcome<br>assessors<br>data analysts                                                                                                  | data<br>collectors<br>outcome<br>assessors | participants<br>data collectors<br>outcome<br>assessors                                                                                            | participants<br>data collectors<br>outcome<br>assessors<br>data analysts                                                                                                                             | 50%       |
| 23 | participants<br>healthcare<br>providers such<br>as physicians or<br>nurses taking<br>care of a<br>participant<br>data collectors<br>outcome<br>assessors<br>data analysts | participants                               | participants<br>healthcare<br>providers such<br>as physicians or<br>nurses taking<br>care of a<br>participant<br><br>outcome<br>assessors          | participants<br>healthcare<br>providers such<br>as physicians<br>or nurses<br>taking care of<br>a participant<br>data collectors<br>outcome<br>assessors<br>data analysts                            | 95%       |

|    |                                                                                                                               |                                                                                                                                   |                                                                                                                               |                                                                                                                                             |                                                                                |
|----|-------------------------------------------------------------------------------------------------------------------------------|-----------------------------------------------------------------------------------------------------------------------------------|-------------------------------------------------------------------------------------------------------------------------------|---------------------------------------------------------------------------------------------------------------------------------------------|--------------------------------------------------------------------------------|
| 24 | participants healthcare providers such as physicians or nurses taking care of a participant data collectors outcome assessors | either participants or healthcare providers such as physicians or nurses taking care of a participant, but generally participants | participants healthcare providers such as physicians or nurses taking care of a participant data collectors outcome assessors | participants healthcare providers such as physicians or nurses taking care of a participant data collectors outcome assessors data analysts | just a and b probably 90%, with the addition of assessors probably around 40%. |
| 25 | participants healthcare providers such as physicians or nurses taking care of a participant                                   | participants                                                                                                                      | participants healthcare providers such as physicians or nurses taking care of a participant                                   | participants<br>b. healthcare providers such as physicians or nurses taking care of a participant<br><br>d. outcome assessors               | 80%                                                                            |



|    |                                                                                                                                                                                                 |              |                                                                                                                                                                         |                                                                                                                                                                                                      |                                                                                                                                                                                                                                                                                                                                          |
|----|-------------------------------------------------------------------------------------------------------------------------------------------------------------------------------------------------|--------------|-------------------------------------------------------------------------------------------------------------------------------------------------------------------------|------------------------------------------------------------------------------------------------------------------------------------------------------------------------------------------------------|------------------------------------------------------------------------------------------------------------------------------------------------------------------------------------------------------------------------------------------------------------------------------------------------------------------------------------------|
| 26 | participants<br>healthcare<br>providers such<br>as physicians or<br>nurses taking<br>care of a<br>participant<br>data collectors<br>outcome<br>assessors                                        | participants | participants<br>healthcare<br>providers such<br>as physicians or<br>nurses taking<br>care of a<br>participant<br>data collectors<br>outcome<br>assessors                | participants,<br>healthcare<br>providers such<br>as physicians<br>or nurses<br>taking care of<br>a participant<br>data collectors<br>outcome<br>assessors<br>data analysts                           | 90%                                                                                                                                                                                                                                                                                                                                      |
| 27 | participants<br>healthcare<br>providers such<br>as physicians or<br>nurses taking<br>care of a<br>participant<br>data collectors                                                                | participants | participants<br>healthcare<br>providers such<br>as physicians or<br>nurses taking<br>care of a<br>participant                                                           | participants<br>healthcare<br>providers such<br>as physicians<br>or nurses<br>taking care of<br>a participant<br>data analystist                                                                     | From my point of view,<br>data collector does not<br>"take part" in the<br>definition of<br>single/double/triple blind<br>trial, because the data<br>collector always is<br>blinded. In my research<br>is very difficult to use a<br>double or triple blind<br>trial. I have only used in<br>research with drugs (5%<br>of my reserach). |
| 28 | *<br>participants<br>*<br>healthcare<br>providers such<br>as physicians or<br>nurses taking<br>care of a<br>participant<br>* data<br>collectors<br>* outcome<br>assessors<br>* data<br>analysts | participants | 1. participants<br>2. healthcare<br>providers such<br>as physicians or<br>nurses taking<br>care of a<br>participant<br>3. data<br>collectors<br>4. outcome<br>assessors | 1.<br>participants<br>2.<br>healthcare<br>providers such<br>as physicians<br>or nurses<br>taking care of<br>a participant<br>3. data<br>collectors<br>4. outcome<br>assessors<br>5. data<br>analysts | Sorry, can't answer.<br>However I rarely see<br>"triple-blind" used,<br>despite my answer to<br>3...and that many of my<br>own "double-blind" trials<br>were "triple-blind"                                                                                                                                                              |

|    |                                                                                                                                                                               |              |                                                                                                                                                           |                                                                                                                                                                                                    |                                                                                                             |
|----|-------------------------------------------------------------------------------------------------------------------------------------------------------------------------------|--------------|-----------------------------------------------------------------------------------------------------------------------------------------------------------|----------------------------------------------------------------------------------------------------------------------------------------------------------------------------------------------------|-------------------------------------------------------------------------------------------------------------|
| 29 | participants<br>healthcare<br>providers such<br>as physicians or<br>nurses taking<br>care of a<br>participant<br>data collectors<br>outcome<br>assessors                      | participants | participants<br>healthcare<br>providers such<br>as physicians or<br>nurses taking<br>care of a<br>participant<br>data collectors<br>outcome<br>assessors  | participants<br>healthcare<br>providers such<br>as physicians<br>or nurses<br>taking care of<br>a participant<br>data collectors<br>outcome<br>assessors<br>data analysts<br>manuscript<br>writers | Do not know. Do you<br>mean what I read or<br>what I have published? I<br>have publishes only one<br>trial. |
| 30 | participants<br>ALL healthcare<br>providers such<br>as physicians or<br>nurses taking<br>care of a<br>participant<br>data collectors<br>outcome<br>assessors<br>data analysts | participants | participants<br>healthcare<br>providers such<br>as physicians or<br>nurses taking<br>care of a<br>participant<br><br>data collectors<br><br>data analysts |                                                                                                                                                                                                    | 80%                                                                                                         |

|    |                                                                                                                                                                                                                                           |                                                                                                                                        |                                                                                                                                                                        |                                                                                                                                                                                                 |                                                                                                                                                                                                                                                                                    |
|----|-------------------------------------------------------------------------------------------------------------------------------------------------------------------------------------------------------------------------------------------|----------------------------------------------------------------------------------------------------------------------------------------|------------------------------------------------------------------------------------------------------------------------------------------------------------------------|-------------------------------------------------------------------------------------------------------------------------------------------------------------------------------------------------|------------------------------------------------------------------------------------------------------------------------------------------------------------------------------------------------------------------------------------------------------------------------------------|
| 31 | outcome assessors<br>data analysts<br>manuscript writers                                                                                                                                                                                  | a. participants<br>b. data collectors<br>c. outcome assessors<br>d. data analysts                                                      | a. participants<br>b. healthcare providers such as physicians or nurses taking care of a participant<br>c. data collectors<br>d. outcome assessors<br>e. data analysts | a. participants<br>b. healthcare providers such as physicians or nurses taking care of a participant<br>c. data collectors<br>d. outcome assessors<br>e. data analysts<br>f. manuscript writers | 70%                                                                                                                                                                                                                                                                                |
| 32 | participants<br>healthcare providers such as physicians or nurses taking care of a participant<br>data collectors<br>outcome assessors                                                                                                    | participants                                                                                                                           | participants<br>healthcare providers such as physicians or nurses taking care of a participant<br>data collectors<br>outcome assessors                                 | participants<br>healthcare providers such as physicians or nurses taking care of a participant<br>data collectors<br>outcome assessors<br>data analysts<br>manuscript writers                   | 80%                                                                                                                                                                                                                                                                                |
| 33 | participants<br>healthcare providers such as physicians or nurses taking care of a participant<br>data collectors<br>Note that the healthcare providers were at the same time the data collectors and the outcome assessors in our trial. | participants                                                                                                                           | a. participants<br>b. healthcare providers such as physicians or nurses taking care of a participant<br>c. data collectors                                             | a. Participants<br>b. healthcare providers such as physicians or nurses taking care of a participant<br>c. data collectors<br>d. outcome assessors                                              | 90%                                                                                                                                                                                                                                                                                |
| 34 | participants<br>data collectors<br>outcome assessors<br>data analysts<br>manuscript writers                                                                                                                                               | participants<br>healthcare providers such as physicians or nurses taking care of a participant<br>data collectors<br>outcome assessors | participants<br>healthcare providers such as physicians or nurses taking care of a participant<br>data collectors<br>outcome assessors                                 | participants<br>healthcare providers such as physicians or nurses taking care of a participant<br>data collectors<br>outcome assessors                                                          | I do not have a personal definition. double blind is any two of the patient, the clinician, the outcome/data collectors. Many trials cannot be truly blinded, including the one you refer to above, where the administering physician is targeting a certain depth of anaesthesia. |

|    |                                                                                                                                                                 |                                                                                                                                                                                                 |                                                                                                                                                                                                 |                                                                                                                                                                                                 |                            |
|----|-----------------------------------------------------------------------------------------------------------------------------------------------------------------|-------------------------------------------------------------------------------------------------------------------------------------------------------------------------------------------------|-------------------------------------------------------------------------------------------------------------------------------------------------------------------------------------------------|-------------------------------------------------------------------------------------------------------------------------------------------------------------------------------------------------|----------------------------|
| 35 | participants healthcare providers such as physicians or nurses taking care of a participant                                                                     | participants healthcare providers such as physicians or nurses taking care of a participant                                                                                                     | participants healthcare providers such as physicians or nurses taking care of a participant                                                                                                     | participants healthcare providers such as physicians or nurses taking care of a participant outcome assessors                                                                                   | 50%                        |
| 36 | participants healthcare providers such as physicians or nurses taking care of a participant data collectors outcome assessors data analysts manuscript writers  | a. participants<br>b. healthcare providers such as physicians or nurses taking care of a participant<br>c. data collectors<br>d. outcome assessors<br>e. data analysts<br>f. manuscript writers | a. participants<br>b. healthcare providers such as physicians or nurses taking care of a participant<br>c. data collectors<br>d. outcome assessors<br>e. data analysts<br>f. manuscript writers | a. participants<br>b. healthcare providers such as physicians or nurses taking care of a participant<br>c. data collectors<br>d. outcome assessors<br>e. data analysts<br>f. manuscript writers | No answer                  |
| 37 | participants healthcare providers such as physicians or nurses taking care of a participant (ATTEMPTED BUT SUCCESS UNCERTAIN) data collectors outcome assessors | participants                                                                                                                                                                                    | participants healthcare providers such as physicians or nurses taking care of a participant                                                                                                     | participants healthcare providers such as physicians or nurses taking care of a participant data collectors outcome assessors data analysts                                                     | SORRY, BUT I HAVE NO IDEA. |

|    |                                                                                                                                                                                                                                                 |                                                                                             |                                                                                                                               |                                                                                                                                             |     |
|----|-------------------------------------------------------------------------------------------------------------------------------------------------------------------------------------------------------------------------------------------------|---------------------------------------------------------------------------------------------|-------------------------------------------------------------------------------------------------------------------------------|---------------------------------------------------------------------------------------------------------------------------------------------|-----|
| 38 | participants healthcare providers such as physicians or nurses taking care of a participant data collectors outcome assessors                                                                                                                   | participants                                                                                | participants healthcare providers such as physicians or nurses taking care of a participant data collectors outcome assessors | participants healthcare providers such as physicians or nurses taking care of a participant data collectors outcome assessors data analysts | 80% |
| 39 | healthcare providers such as physicians or nurses taking care of a participant - after first day only [nurses in preadmission clinic were actually part of the intervention] data collectors outcome assessors data analysts manuscript writers | participants healthcare providers such as physicians or nurses taking care of a participant | participants healthcare providers such as physicians or nurses taking care of a participant                                   | participants healthcare providers such as physicians or nurses taking care of a participant outcome assessors                               | 75  |
| 40 | No answer                                                                                                                                                                                                                                       | No answer                                                                                   | No answer                                                                                                                     | No answer                                                                                                                                   | 90  |
